# Supplementary material
Source: PubMed Central journal article supplement (PMC2696820)
Supplement: NIHMS99951-supplement-supplement_1.pdf [file NIHMS99951-supplement-supplement_1.pdf]

**Supplementary Figures Legend**

**Supplementary Figure 1. Immunocytochemistry (ICC) protocol for human cells.**

**Supplementary Figure 2. Immunohistochemistry (IHC) protocol for human tissue.**

**Supplementary Figure 3. Electron Microscopy (EM) Tissue Embedding Protocol for human tissue. 3B, Aluminum foil molds.**

**Supplementary Figure 4. Pre-embedding Immuno-gold ICC and Inclusion for Electron Microscopy (EM) for human cells.**

**Supplementary Figure 5. Electron Microscopy (EM) for Neurosphere Assays from human cells.**
